# Supplementary material for: GWAS meta-analysis of CSF Alzheimer's disease biomarkers 18,948 individuals reveal novel loci and genes regulating lipid metabolism, brain volume and autophagy
Source: Research Square preprint supplement (doi:10.21203/rs.3.rs-6597595/v1), 2025-05-21
Supplement: Supplementary file 1 [file 7193452e5a14542e3ca55110.docx]

**Supplementary Figure 1:** Locus zoom and forest plot for significant loci associated with Aβ42 from meta-analysis. **(A)** Variant rs1077933 located within CR1 gene region. **(B)** Variantrs6733839 located within BIN1 gene region. Forest plot shows the effect size, standard error, p-value and sample size within each cohort included in meta-analyses as well as meta-analysis result. The dot and whiskers represent Effect size and its corresponding 95% confidence interval (L95=lower end, U95=upper end) within each cohort. META represents meta-analysis result from METAL.

**Supplementary Figure 2:** Locus zoom and forest plot for significant loci associated with t-tau from meta-analysis. **(A)** Variant rs6733839 located within BIN1 gene region. **(B)** Variantrs35327527 located within GMNC/CCDC50 gene region. **(C)** Variantrs798490 located within GNA12/AMZ1 gene region. Forest plot shows the effect size, standard error, p-value and sample size within each cohort included in meta-analyses as well as meta-analysis result. The dot and whiskers represent Effect size and its corresponding 95% confidence interval (L95=lower end, U95=upper end) within each cohort. META represents meta-analysis result from METAL.

**Supplementary Figure 3:** Locus zoom and forest plot for significant loci associated with t-tau from meta-analysis. **(A)** Variant rs1654723 located within ANGPT1 gene region. **(B)** Variantrs57263785 located within SMARCA2 gene region. **(C)** Variantrs7928895 located within MS4A family gene region. Forest plot shows the effect size, standard error, p-value and sample size within each cohort included in meta-analyses as well as meta-analysis result. The dot and whiskers represent Effect size and its corresponding 95% confidence interval (L95=lower end, U95=upper end) within each cohort. META represents meta-analysis result from METAL.

**Supplementary Figure 4**: Locus zoom and forest plot for significant loci associated with t-tau from meta-analysis. **(A)** Variant rs11045930 located within SLCO1A2 gene region. **(B)** Variant **r**s4843552 located within C16orf95/MAP1LC3B gene region. Forest plot shows the effect size, standard error, p-value and sample size within each cohort included in meta-analyses as well as meta-analysis result. The dot and whiskers represent Effect size and its corresponding 95% confidence interval (L95=lower end, U95=upper end) within each cohort. META represents meta-analysis result from METAL.

**Supplementary Figure 5:** Locus zoom and forest plot for significant loci associated with p-tau181 from meta-analysis. **(A)** Variant rs6733839 located within BIN1 gene region. **(B)** Variantrs35327527 located within GMNC/CCDC50 gene region. Forest plot shows the effect size, standard error, p-value and sample size within each cohort included in meta-analyses as well as meta-analysis result. The dot and whiskers represent Effect size and its corresponding 95% confidence interval (L95=lower end, U95=upper end) within each cohort. META represents meta-analysis result from METAL.

**Supplementary Figure 6:** Locus zoom and forest plot for significant loci associated with p-tau181 from meta-analysis. **(A)** Variant rs798560 located within GNA12/AMZ1 gene region. **(B)** Variantrs57263785 located within SMARCA2 gene region. **(C)** Variantrs1582763 located within MS4A family gene region. Forest plot shows the effect size, standard error, p-value and sample size within each cohort included in meta-analyses as well as meta-analysis result. The dot and whiskers represent Effect size and its corresponding 95% confidence interval (L95=lower end, U95=upper end) within each cohort. META represents meta-analysis result from METAL.

**Supplementary Figure 7:** Locus zoom and forest plot for significant loci associated with p-tau181 from meta-analysis. **(A)** Variant rs11045930 located within SLCO1A2 gene region. **(B)** Variant **r**s4843552 located within C16orf95/MAP1LC3B gene region. Forest plot shows the effect size, standard error, p-value and sample size within each cohort included in meta-analyses as well as meta-analysis result. The dot and whiskers represent Effect size and its corresponding 95% confidence interval (L95=lower end, U95=upper end) within each cohort. META represents meta-analysis result from METAL.

**Supplementary Figure 8:** Manhattan plot showing negative log10-transformed p- values from the non-European ancestry GWAS of all three CSF biomarkers. The horizontal lines represent the genome-wide significance threshold, p=5 × 10−8 (orange) and suggestive threshold, p= 1×10−5 (grey). **(A)** Aβ42 **(B)** t-tau **(C)** p-tau181


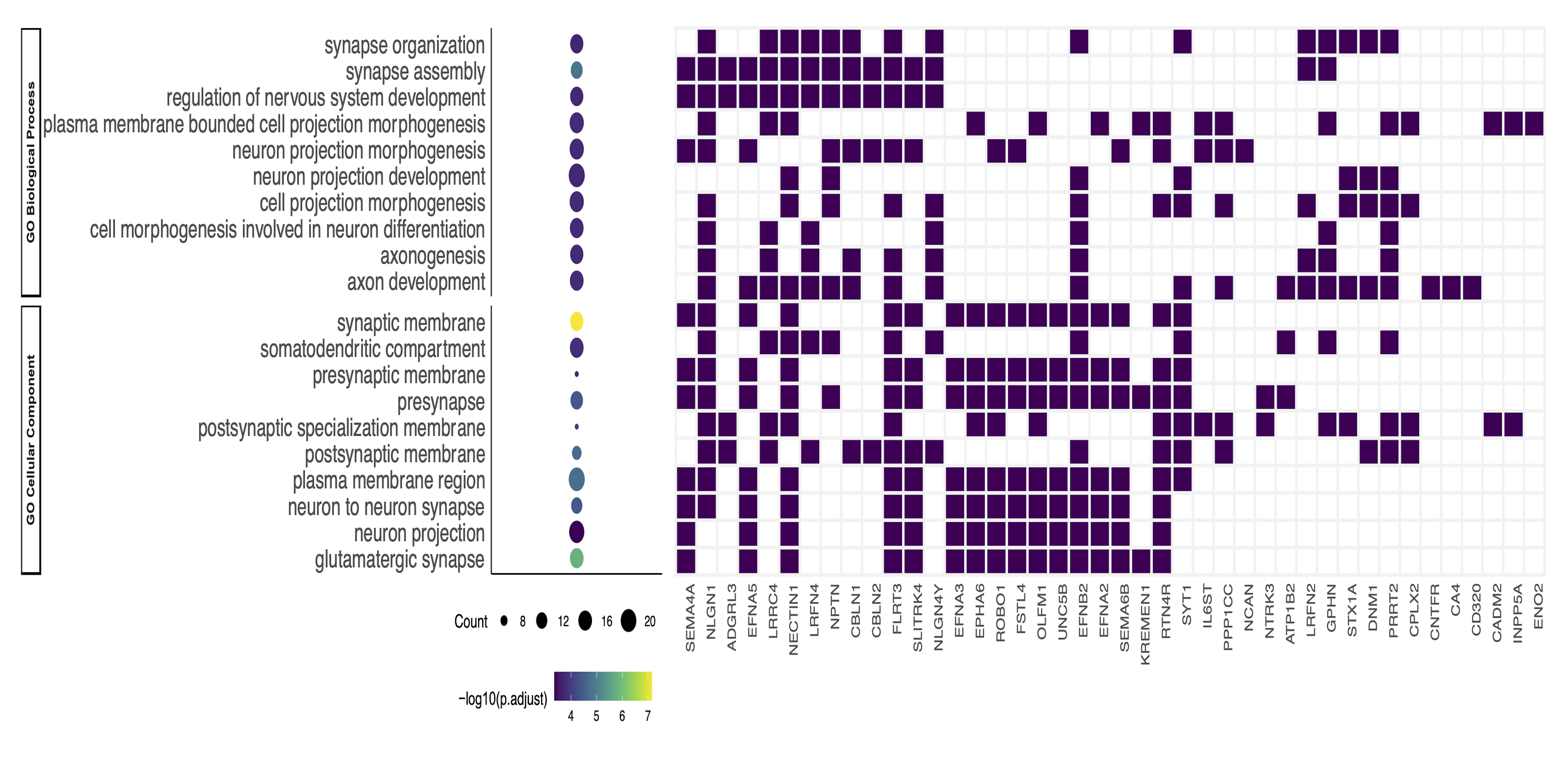


**Supplementary Figure 9:** Pathway plot for all trans protein QTLs that colocalize with Chromosome 16 loci. The gene ids associated with these proteins were used for pathway enrichment. Y-axis shows top Gene Ontology (GO) terms that pass FDR <0.05 threshold, in descending order of significance. Color of dot plots show the FDR p value whereas sizes of dots represent the number of genes within the pathway. The corresponding heatmap shows the genes present within each path.

**Supplementary Figure 10: (A)** Identity by descent (IBD) plot showing probability of sharing no allele (Z0; x-axis) and one allele (Z1; y-axis) in related individuals. “0” Z0 and Z1 value shows exact duplicates whereas “1” Z1 shows parent-offspring pairs. Only individuals with pihat <0.2 were kept. **(B)** Genetic principal component analysis (PCA) plot of study samples with 1000 Genomes samples as anchor. Only European ancestry population (PC1<0; PC2>-0.003) population were kept.
